# Supplementary material for: Formation of giant polymer vesicles by simple double emulsification using block copolymers as the sole surfactant
Source: Royal Society of Chemistry journal article supplement (doi:10.1039/d1sm00301a), 2021-01-01
Supplement: d1sm00301a1.pdf [file d1sm00301a1.pdf]

## Supplementary Information

### Formation of Giant Polymer Vesicles by Simple Double Emulsification using Block Copolymers as the Sole Surfactant

Mazarine Houbrechts<sup>a,b</sup>, Lucas Caire da Silva<sup>a\*</sup>, Anitha Ethirajan<sup>b,c</sup>, and Katharina Landfester<sup>a\*</sup>

<sup>a</sup> Physical Chemistry of Polymers, Max Planck Institute for Polymer Research, Ackermannweg 10, 55128 Mainz, Germany

<sup>b</sup> Institute for Materials Research, Hasselt University, Wetenschapspark 1, 3590 Diepenbeek, Belgium.

<sup>c</sup> IMEC associated lab IMOMECE, Wetenschapspark 1, 3590 Diepenbeek, Belgium.

Corresponding authors: landfester@mpip-mainz.mpg.de, silva@mpip-mainz.mpg.de

**Table S1.** Information about the copolymers used to form vesicles.

| <b>copolymer (M<sub>n</sub>)</b> | <b>BD addition type</b> | <b>BD units</b> | <b>EO units</b> | <b>PDI</b> |
|----------------------------------|-------------------------|-----------------|-----------------|------------|
| 1200-600                         | 1,2                     | 22              | 14              | 1.17       |
| 4000-2000                        | 1,2                     | 74              | 45              | 1.12       |
| 6100-3200                        | 1,2                     | 113             | 73              | 1.07       |

BD: butadiene; EO: ethylene oxide. M<sub>n</sub>: number average molecular weight. PDI: M<sub>w</sub>/M<sub>n</sub>

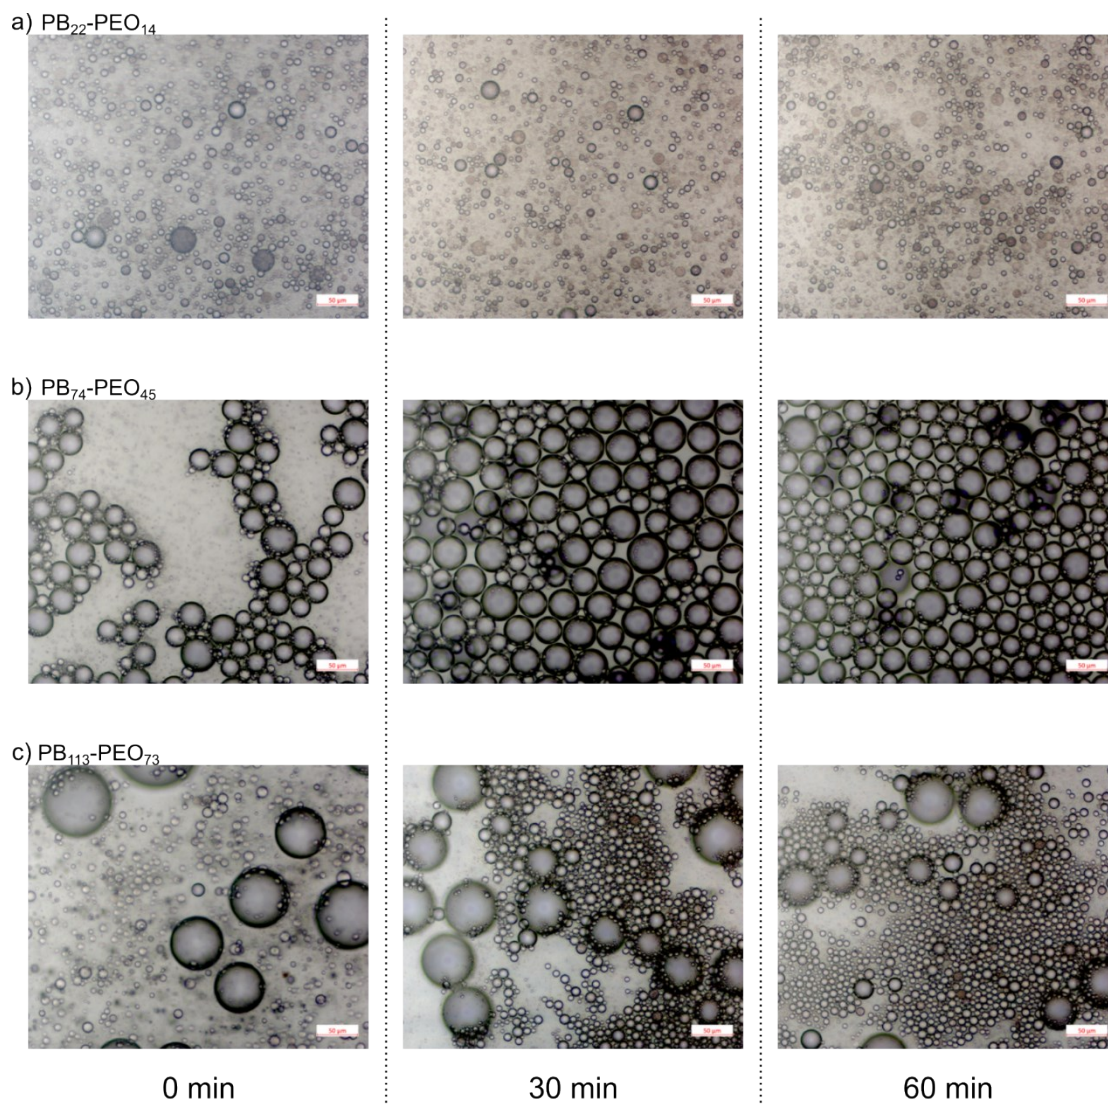

**Fig. S1** Micrographs of W/O droplets at 20 g L<sup>-1</sup> at different times. Scale bars: 50 μm

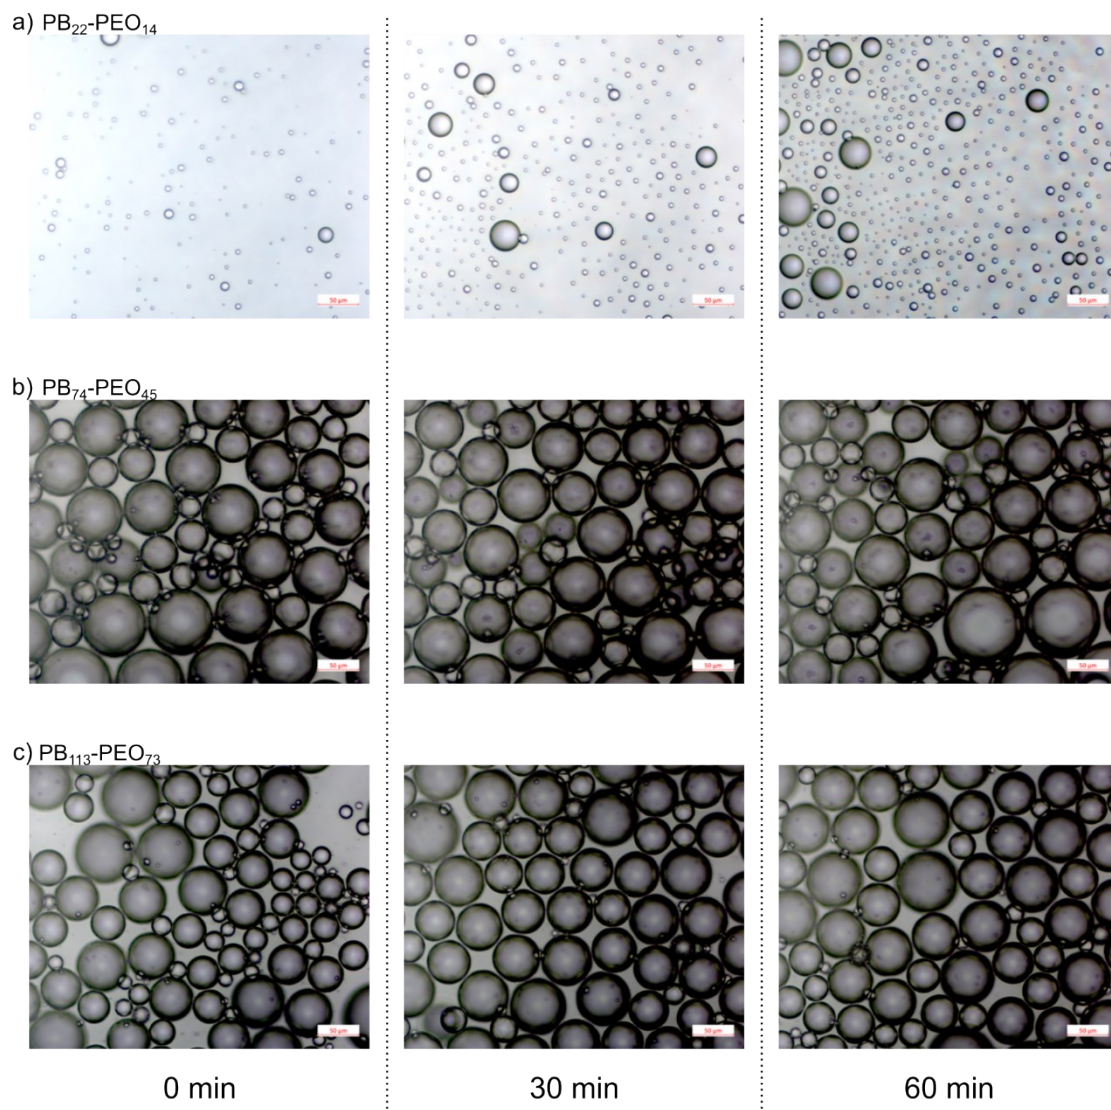

**Fig. S2** Micrographs of W/O droplets at 1 g L<sup>-1</sup> at different times. Scale bars: 50 μm

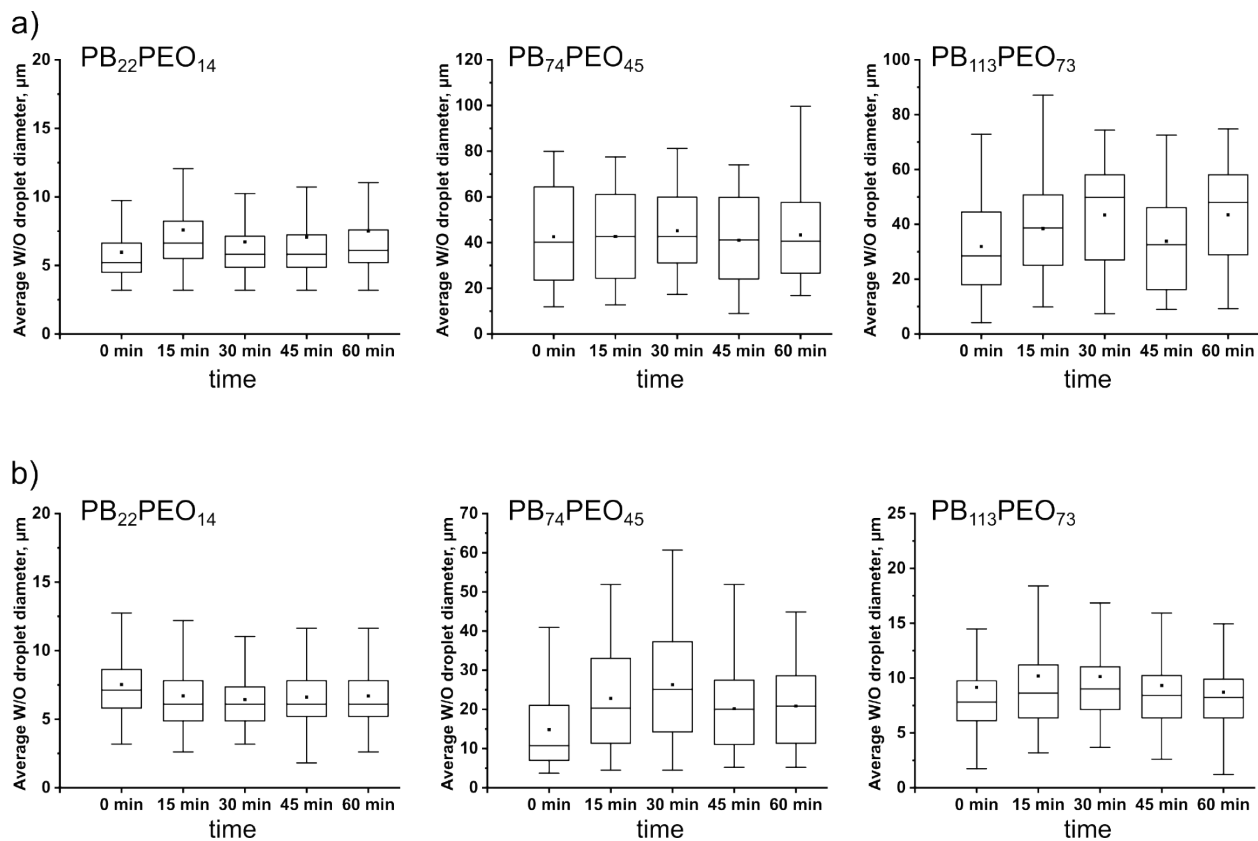

**Fig. S3** Size distribution of W/O droplets determined at different times for copolymer concentrations at a) 1 g L<sup>-1</sup>, b) 20 g L<sup>-1</sup>.

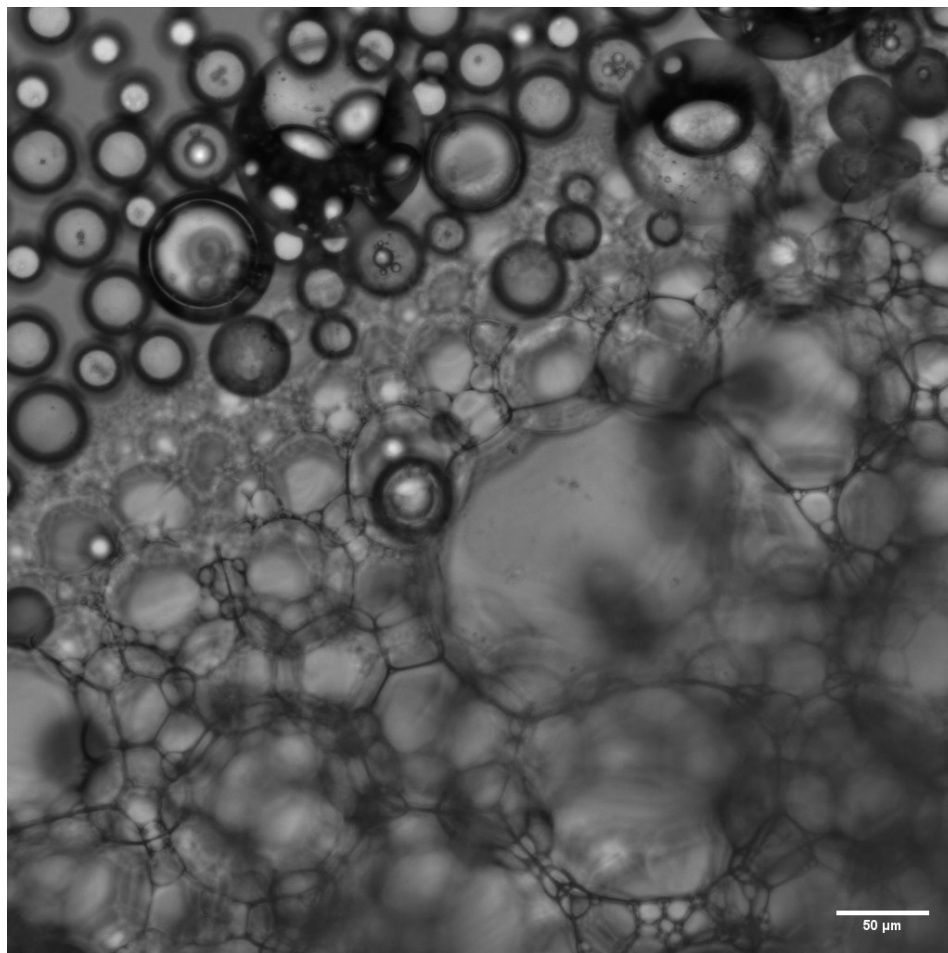

**Fig. S4** Micrograph showing single and complex DEDs formed immediately after the first emulsification using P2 (10 g L<sup>-1</sup>) as surfactant.

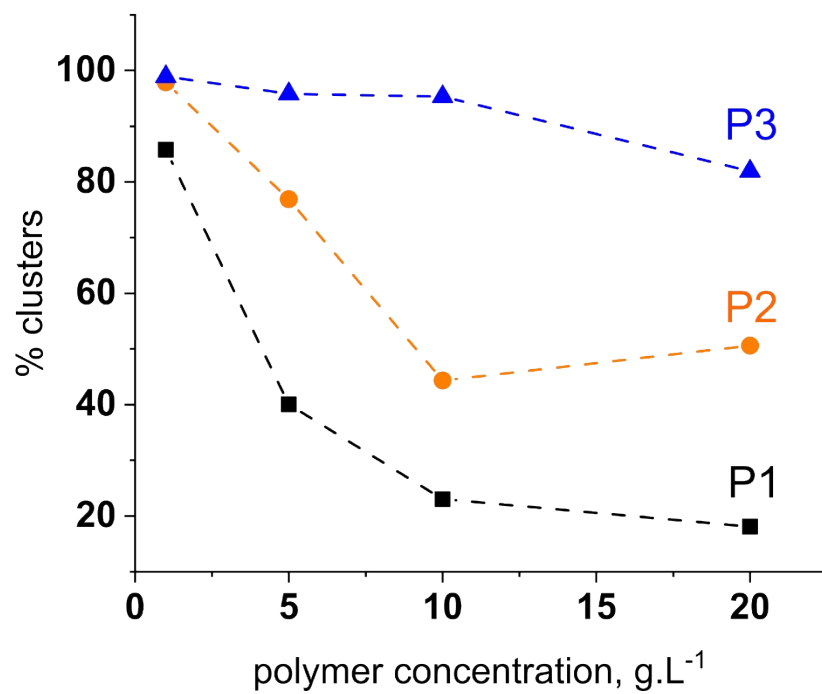

**Fig. S5** Fraction of clusters relative to the total number of aggregates (single vesicles + clusters).
